# Supplementary material for: Gypenosides ameliorate high-fat diet-induced nonalcoholic fatty liver disease in mice by regulating lipid metabolism
Source: PeerJ. 2023 Apr 11;11:e15225. doi: 10.7717/peerj.15225 (PMC10103699; doi:10.7717/peerj.15225)
Supplement: Supplemental Information 1 [file peerj-11-15225-s001.xlsx]

## Sheet: Sheet1
Sample	1	2	3	4	5	6	7	8	9	10	11	12
A	ND _0001 1/3	ND _0002 1/3	ND _0003 1/3	ND _0004 1/3	ND _0005 1/3	ND _0006 1/3	ND _0007 1/3	ND _0008 1/3	ND _0009 1/3	ND _0010 1/3	ND _0011 1/3
B	ND _0001 2/3	ND _0002 2/3	ND _0003 2/3	ND _0004 2/3	ND _0005 2/3	ND _0006 2/3	ND _0007 2/3	ND _0008 2/3	ND _0009 2/3	ND _0010 2/3	ND _0011 2/3
C	ND _0001 3/3	ND _0002 3/3	ND _0003 3/3	ND _0004 3/3	ND _0005 3/3	ND _0006 3/3	ND _0007 3/3	ND _0008 3/3	ND _0009 3/3	ND _0010 3/3	ND _0011 3/3
D	HFD_0001 1/3	HFD_0002 1/3	HFD_0003 1/3	HFD_0004 1/3	HFD_0005 1/3	HFD_0006 1/3	HFD_0007 1/3	HFD_0008 1/2	HFD_0009 1/2
E	HFD_0001 2/3	HFD_0002 2/3	HFD_0003 2/3	HFD_0004 2/3	HFD_0005 2/3	HFD_0006 2/3	HFD_0007 2/3	HFD_0008 2/2	HFD_0009 2/2
F	HFD_0001 3/3	HFD_0002 3/3	HFD_0003 3/3	HFD_0004 3/3	HFD_0005 3/3	HFD_0006 3/3	HFD_0007 3/3
G
H	Blank 1/3	Blank 2/3	Blank 3/3			Standard 1/2	Standard 2/2
Absorbance	1	2	3	4	5	6	7	8	9	10	11	12
A	0.16	0.1539	0.1654	0.1618	0.1685	0.1542	0.1333	0.1523	0.1565	0.1608	0.1385
B	0.1753	0.1519	0.1665	0.161	0.1797	0.1763	0.1488	0.1591	0.166	0.1712	0.1487
C	0.1725	0.1556	0.166	0.1617	0.1878	0.1819	0.1468	0.1611	0.1669	0.1791	0.1543
D	0.137	0.1937	0.2809	0.1984	0.1922	0.2327	0.1544	0.1898	0.1605
E	0.144	0.2448	0.3757	0.2162	0.2435	0.3579	0.1849	0.1435	0.1617
F	0.1394	0.2233	0.3355	0.2575	0.2152	0.4621	0.1458
G
H	0.0522	0.0526	0.0545			0.2466	0.2443
Sample	1	2	3	4	5	6	7	8	9	10	11	12
A	GP_0001 1/3	GP_0002 1/3	GP_0003 1/3	GP_0004 1/3	GP_0005 1/3	GP_0006 1/3	GP_0007 1/3	GP_0008 1/3	GP_0009 1/3
B	GP_0001 2/3	GP_0002 2/3	GP_0003 2/3	GP_0004 2/3	GP_0005 2/3	GP_0006 2/3	GP_0007 2/3	GP_0008 2/3	GP_0009 2/3
C	GP_0001 3/3	GP_0002 3/3	GP_0003 3/3	GP_0004 3/3	GP_0005 3/3	GP_0006 3/3	GP_0007 3/3	GP_0008 3/3	GP_0009 3/3
D
E
F
G
H	Blank 1/3	Blank 2/3	Blank 3/3		Standard 1/2	Standard 2/2
Absorbance	1	2	3	4	5	6	7	8	9	10	11	12
A	0.1824	0.2361	0.1963	0.1417	0.1319	0.2126	0.2155	0.2374	0.184
B	0.1975	0.2631	0.2202	0.1521	0.1449	0.2331	0.2288	0.2499	0.1886
C	0.1935	0.2624	0.2206	0.1488	0.1355	0.2441	0.2437	0.2763	0.2005
D
E
F
G
H	0.0542	0.0541	0.0555		0.2324	0.2491
