# Supplementary material for: Gypenosides ameliorate high-fat diet-induced nonalcoholic fatty liver disease in mice by regulating lipid metabolism
Source: PeerJ. 2023 Apr 11;11:e15225. doi: 10.7717/peerj.15225 (PMC10103699; doi:10.7717/peerj.15225)
Supplement: Supplemental Information 2 [file peerj-11-15225-s002.xlsx]

## Sheet: Sheet1
Sample	1	2	3	4	5	6	7	8	9	10	11	12
A	ND TG_0001 1/3	ND TG_0002 1/3	ND TG_0003 1/3	ND TG_0004 1/3	ND TG_0005 1/3	ND TG_0006 1/3	ND TG_0007 1/3	ND TG_0008 1/3	ND TG_0009 1/3	ND TG_0010 1/3	ND TG_0011 1/3
B	ND TG_0001 2/3	ND TG_0002 2/3	ND TG_0003 2/3	ND TG_0004 2/3	ND TG_0005 2/3	ND TG_0006 2/3	ND TG_0007 2/3	ND TG_0008 2/3	ND TG_0009 2/3	ND TG_0010 2/3	ND TG_0011 2/3
C	ND TG_0001 3/3	ND TG_0002 3/3	ND TG_0003 3/3	ND TG_0004 3/3	ND TG_0005 3/3	ND TG_0006 3/3	ND TG_0007 3/3	ND TG_0008 3/3	ND TG_0009 3/3	ND TG_0010 3/3	ND TG_0011 3/3
D	HFD TG_0001 1/3	HFD TG_0002 1/3	HFD TG_0003 1/3	HFD TG_0004 1/3		HFD TG_0005 1/3	HFD TG_0006 1/3	HFD TG_0007 1/3	HFD TG_0008 1/3	HFD TG_0009 1/3
E	HFD TG_0001 2/3	HFD TG_0002 2/3	HFD TG_0003 2/3	HFD TG_0004 2/3		HFD TG_0005 2/3	HFD TG_0006 2/3	HFD TG_0007 2/3	HFD TG_0008 2/3	HFD TG_0009 2/3
F	HFD TG_0001 3/3	HFD TG_0002 3/3	HFD TG_0003 3/3	HFD TG_0004 3/3		HFD TG_0005 3/3	HFD TG_0006 3/3	HFD TG_0007 3/3	HFD TG_0008 3/3	HFD TG_0009 3/3
G
H	Blank 1/3	Blank 2/3	Blank 3/3		Standard 1/3	Standard 2/3	Standard 3/3
Absorbance	1	2	3	4	5	6	7	8	9	10	11	12
A	0.1192	0.1117	0.1791	0.1405	0.1263	0.1683	0.1296	0.1088	0.1248	0.1394	0.1216
B	0.1192	0.1116	0.1775	0.1499	0.1299	0.1715	0.1284	0.1074	0.1296	0.1316	0.1221
C	0.1248	0.1115	0.1622	0.1405	0.1298	0.1678	0.1324	0.1142	0.1366	0.1299	0.1243
D	0.204	0.1204	0.124	0.1211		0.1143	0.1132	0.1321	0.1217	0.2295
E	0.2195	0.1165	0.1252	0.1231		0.1123	0.1091	0.1325	0.1119	0.1054
F	0.2315	0.1168	0.1255	0.1252		0.1132	0.1134	0.1394	0.1144	0.1078
G
H	0.0714	0.068	0.0694		0.2575	0.2924	0.2581
Sample	1	2	3	4	5	6	7	8	9	10	11	12
A	GP_0001 1/3	GP_0002 1/3	GP_0003 1/3	GP_0004 1/3	GP_0005 1/3	GP_0006 1/3	GP_0007 1/3	GP_0008 1/3	GP_0009 1/3
B	GP_0001 2/3	GP_0002 2/3	GP_0003 2/3	GP_0004 2/3	GP_0005 2/3	GP_0006 2/3	GP_0007 2/3	GP_0008 2/3	GP_0009 2/3
C	GP_0001 3/3	GP_0002 3/3	GP_0003 3/3	GP_0004 3/3	GP_0005 3/3	GP_0006 3/3	GP_0007 3/3	GP_0008 3/3	GP_0009 3/3
D
E
F
G
H	Blank 1/3	Blank 2/3	Blank 3/3		Standard 1/3	Standard 2/3	Standard 3/3
Absorbance	1	2	3	4	5	6	7	8	9	10	11	12
A	0.1034	0.1069	0.1152	0.1332	0.0974	0.1039	0.1052	0.1166	0.0904
B	0.1041	0.1109	0.1179	0.1065	0.0908	0.1106	0.1072	0.1138	0.0906
C	0.1198	0.113	0.1189	0.1109	0.0978	0.1111	0.1151	0.112	0.0921
D
E
F
G
H	0.0662	0.0659	0.0672		0.2464	0.2595	0.2557
