# Supplementary material for: Gypenosides ameliorate high-fat diet-induced nonalcoholic fatty liver disease in mice by regulating lipid metabolism
Source: PeerJ. 2023 Apr 11;11:e15225. doi: 10.7717/peerj.15225 (PMC10103699; doi:10.7717/peerj.15225)
Supplement: Supplemental Information 3 [file peerj-11-15225-s003.xlsx]

## Sheet: Sheet1
Sample	1	2	3	4	5	6	7	8	9	10	11	12
A	LDL ND_0001 1/3	LDL ND_0002 1/3	LDL ND_0003 1/3	LDL ND_0004 1/3	LDL ND_0005 1/3	LDL ND_0006 1/3	LDL ND_0007 1/3	LDL ND_0008 1/3	LDL ND_0009 1/3
B	LDL ND_0001 2/3	LDL ND_0002 2/3	LDL ND_0003 2/3	LDL ND_0004 2/3	LDL ND_0005 2/3	LDL ND_0006 2/3	LDL ND_0007 2/3	LDL ND_0008 2/3	LDL ND_0009 2/3
C	LDL ND_0001 3/3	LDL ND_0002 3/3	LDL ND_0003 3/3	LDL ND_0004 3/3	LDL ND_0005 3/3	LDL ND_0006 3/3	LDL ND_0007 3/3	LDL ND_0008 3/3	LDL ND_0009 3/3
D	LDL HFD_0001 1/3	LDL HFD_0002 1/2		LDL HFD_0004 1/3	LDL HFD_0005 1/3	LDL HFD_0006 1/3		LDL HFD_0008 1/3	LDL HFD_0009 1/3
E	LDL HFD_0001 2/3		LDL HFD_0003 1/1	LDL HFD_0004 2/3	LDL HFD_0005 2/3	LDL HFD_0006 2/3	LDL HFD_0007 1/2	LDL HFD_0008 2/3	LDL HFD_0009 2/3
F	LDL HFD_0001 3/3	LDL HFD_0002 2/2		LDL HFD_0004 3/3	LDL HFD_0005 3/3	LDL HFD_0006 3/3	LDL HFD_0007 2/2	LDL HFD_0008 3/3	LDL HFD_0009 3/3
G
H		blank 1/2	blank 2/2							standard 1/3	standard 2/3	standard 3/3
Absorbance-1	1	2	3	4	5	6	7	8	9	10	11	12
A	0.0595	0.063	0.0632	0.0616	0.0647	0.0661	0.0652	0.0591	0.0646
B	0.0636	0.0684	0.0641	0.0677	0.0652	0.0704	0.0598	0.0569	0.0645
C	0.0599	0.0634	0.0633	0.0619	0.0638	0.0714	0.0639	0.0576	0.0649
D	0.0574	0.0656		0.0673	0.0679	0.0722		0.0814	0.0636
E	0.0573		0.0698	0.05	0.0657	0.0681	0.0583	0.0591	0.0629
F	0.0578	0.0659		0.0564	0.2928	0.0685	0.0607	0.0613	0.0627
G
H		0.0495	0.0487							0.0644	0.0653	0.0662
Absorbance-2	1	2	3	4	5	6	7	8	9	10	11	12
A	0.0923	0.0883	0.1135	0.1249	0.1259	0.1082	0.1185	0.1293	0.0974
B	0.0814	0.1048	0.1258	0.1526	0.1359	0.1217	0.1266	0.1278	0.1026
C	0.0839	0.1027	0.1248	0.1397	0.1342	0.1181	0.1224	0.1189	0.0967
D	0.0965	0.1289		0.1641	0.1596	0.2134		0.1335	0.1198
E	0.0932		0.2222	0.0718	0.1616	0.2015	0.1192	0.1246	0.1229
F	0.1041	0.1115		0.0728	0.1313	0.1765	0.1226	0.1241	0.1114
G
H		0.0649	0.0579							0.3101	0.3456	0.4045
Sample	1	2	3	4	5	6	7	8	9	10	11	12
A	GP LDL_0001 1/2		GP LDL_0003 1/1	GP LDL_0004 1/2	GP LDL_0005 1/1	GP LDL_0006 1/2		GP LDL_0008 1/2	GP LDL_0009 1/1			blank 1/2
B	GP LDL_0001 2/2	GP LDL_0002 1/1		GP LDL_0004 2/2		GP LDL_0006 2/2	GP LDL_0007 1/1	GP LDL_0008 2/2				blank 2/2
C												standard 1/2
D												standard 2/2
Absorbance-1	1	2	3	4	5	6	7	8	9	10	11	12
A	0.0539		0.0595	0.0541	0.0544	0.0599		0.0598	0.0573			0.0466
B	0.0542	0.0573		0.0542		0.0618	0.0557	0.0632				0.0491
C												0.07
D												0.0678
Absorbance-2	1	2	3	4	5	6	7	8	9	10	11	12
A	0.0949		0.2069	0.0929	0.0887	0.1157		0.1339	0.0971			0.0668
B	0.1046	0.126		0.0898		0.1174	0.1199	0.1476				0.0615
C												0.3874
D												0.4159
