# Supplementary material for: Gypenosides ameliorate high-fat diet-induced nonalcoholic fatty liver disease in mice by regulating lipid metabolism
Source: PeerJ. 2023 Apr 11;11:e15225. doi: 10.7717/peerj.15225 (PMC10103699; doi:10.7717/peerj.15225)
Supplement: Supplemental Information 5 [file peerj-11-15225-s005.xlsx]

## Sheet: Sheet1
Group	Day0	Day14	Day28	Day42	Day56	Day70	Day84	Day98	Day112	Day126	Day140	Day154	Day168	Day182	Day196	Day210	Day224	Day238	Day252	Day266
ND_38_1	28	29.6	29.5	30.1	30.4	30.5	30.5	31.1	31.5	31.5	30.8	32	31.3	31.3	31.3	31.6	31.3	32.5	32.8	31.6
ND_38_2	25.3	25.3	25.8	26.6	26.4	26.6	26.6	27.7	27.9	27.8	28.6	28.8	27.7	27.8	28.1	28.5	28.4	28.4	28.6	27.8
ND_38_3	29	30.3	31	32.1	32.3	32.1	32.8	32.8	33.1	34.2	34.8	34.8	33.7	35.6	35.4	36.4	36.4	37.2	36.9	36.2
ND_38_4	30.5	30.9	30.4	30.8	32.4	31	31	32.3	32.5	32.9	32.1	32.9	32.3	33	31.9	33.3	32.5	32.3	33.8	32.3
ND_38_5	29.6	30.3	32.3	31.9	32.4	31.8	32.4	32.9	32.5	33.5	33	32.4	31.9	33.7	33.6	33.8	34.3	34.3	34.9	34
ND_38_6	31.1	31.8	32.1	33.2	33.8	33.6	33.8	32.7	33.8	36.1	35.6	36	34.8	35.6	35.5	35.9	35.2	35.6	36.5	34.5
ND_38_7	29.2	29.6	30.7	31.9	30.9	31.8	33.2	32.6	31.3	30.6	30.2	30.6	30.3	30.2	29.7	29.8	30.2	28.6	28.8	28.4
ND_38_8	29.4	28.3	29.3	29.9	29.8	30.4	30.8	31.7	32.7	32.1	31.9	31.4	31.4	31.7	31.2	31.9	31.8	31.3	32.1	31.5
ND_38_9	29	29.2	29.7	31.5	31	31.6	32.4	32.8	32.7	34	34.4	33.1	32.8	34.4	33.4	33.7	33.8	34.7	35	34.5
HFD_38_1	30	30.9	31.5	33.1	35.4	37.4	40.8	43.8	49.1	49.8	51.8	52.7	53.5	54.7	55.7	54.8	50.2	42.5	36.4	30.8
HFD_38_2	26.9	28	28.5	30.8	33.4	36.5	39.8	41.6	44.7	46.7	48.9	51.2	50.2	45.8	44.1	42.8	40.8	38	39.2	40
HFD_38_3	27.5	28.8	30	31.3	34	36.2	39.4	42.5	47.6	49.2	51.3	51	51.6	52.2	52.4	49.4	46.6	49.1	50.3	51.6
HFD_38_4	28.8	31.9	34.9	37.5	40	43.5	48.6	52	53.7	54	54.5	54.7	54.4	54.2	47.5	46	46.3	44.7	44.9	42.7
HFD_38_5	27.6	27.9	30.1	31.4	35.8	39.2	42.1	45	48	48.7	49.8	51.3	53.7	53.9	53.9	51.9	45.7	40.6	38.5	36.7
HFD_38_6	28.1	28.6	31.2	31.3	33	34.8	35.4	37.5	38.9	41.8	46.1	44.8	46.8	49.7	52	52.3	49.9	48.1	45.6	49.1
GP_38_1	28.2	30.5	31.3	32.9	37.3	41.3	45	46.9	50	52.5	49.5	44	45.9	47.1	40.9	39.3	44.7	51.3	50.6	43
GP_38_2	28.8	32.8	36	39.4	43.8	48.2	53.7	53.1	54.7	55	55.8	56	54.3	54.4	57.6	57.1	53.3	50.8	50.1	53.4
GP_38_3	26.2	29.4	31.8	34.5	36.2	39.7	43.2	43.3	47	49.6	51.4	52	50.7	52.9	53.9	54.5	53	54.5	56.7	55.4
GP_38_4	26.8	31.4	33.5	34.4	36	39.3	41.6	42.8	44.8	46.9	48.8	48.4	43.9	41.4	39.2	38.9	41.8	47.1	49.9	46.3
GP_38_5	32.4	33.9	35.6	35.8	36.6	37.9	41.3	43.1	46.4	52.3	56	58.6	55.7	55.4	51.8	48.5	42.3	41.8	42.5	42.6
GP_38_6	33.1	33.6	36	38.9	43.1	48.6	54.3	56	57.4	58.3	60	60.2	56.5	60.4	62	63	59.4	62.9	63.4	63
GP_38_7	26.8	31.9	33.4	35.3	36.3	40.5	45.9	47.4	49.5	49.8	50.9	46.6	48.5	52.5	53.6	53.4	46.7	49.9	54.7	53.8
GP_38_8	29.1	30.7	32.2	33.4	36.8	39.6	43.5	43.9	46.5	49.5	51	51.4	50.5	52.4	54.1	53.4	44.4	44.4	49.4	50.2
GP_38_9	29.7	30.7	32.5	31.6	32.9	32.2	32.5	32.2	31.6	30.7	31	30.4	32.4	30.5	31.1	29.5	31.4	30.3	31.3	30.1
